# Supplementary material
Source: PubMed Central journal article supplement (PMC7188575)
Supplement: NIHMS1541326-supplement-2.pdf [file NIHMS1541326-supplement-2.pdf]

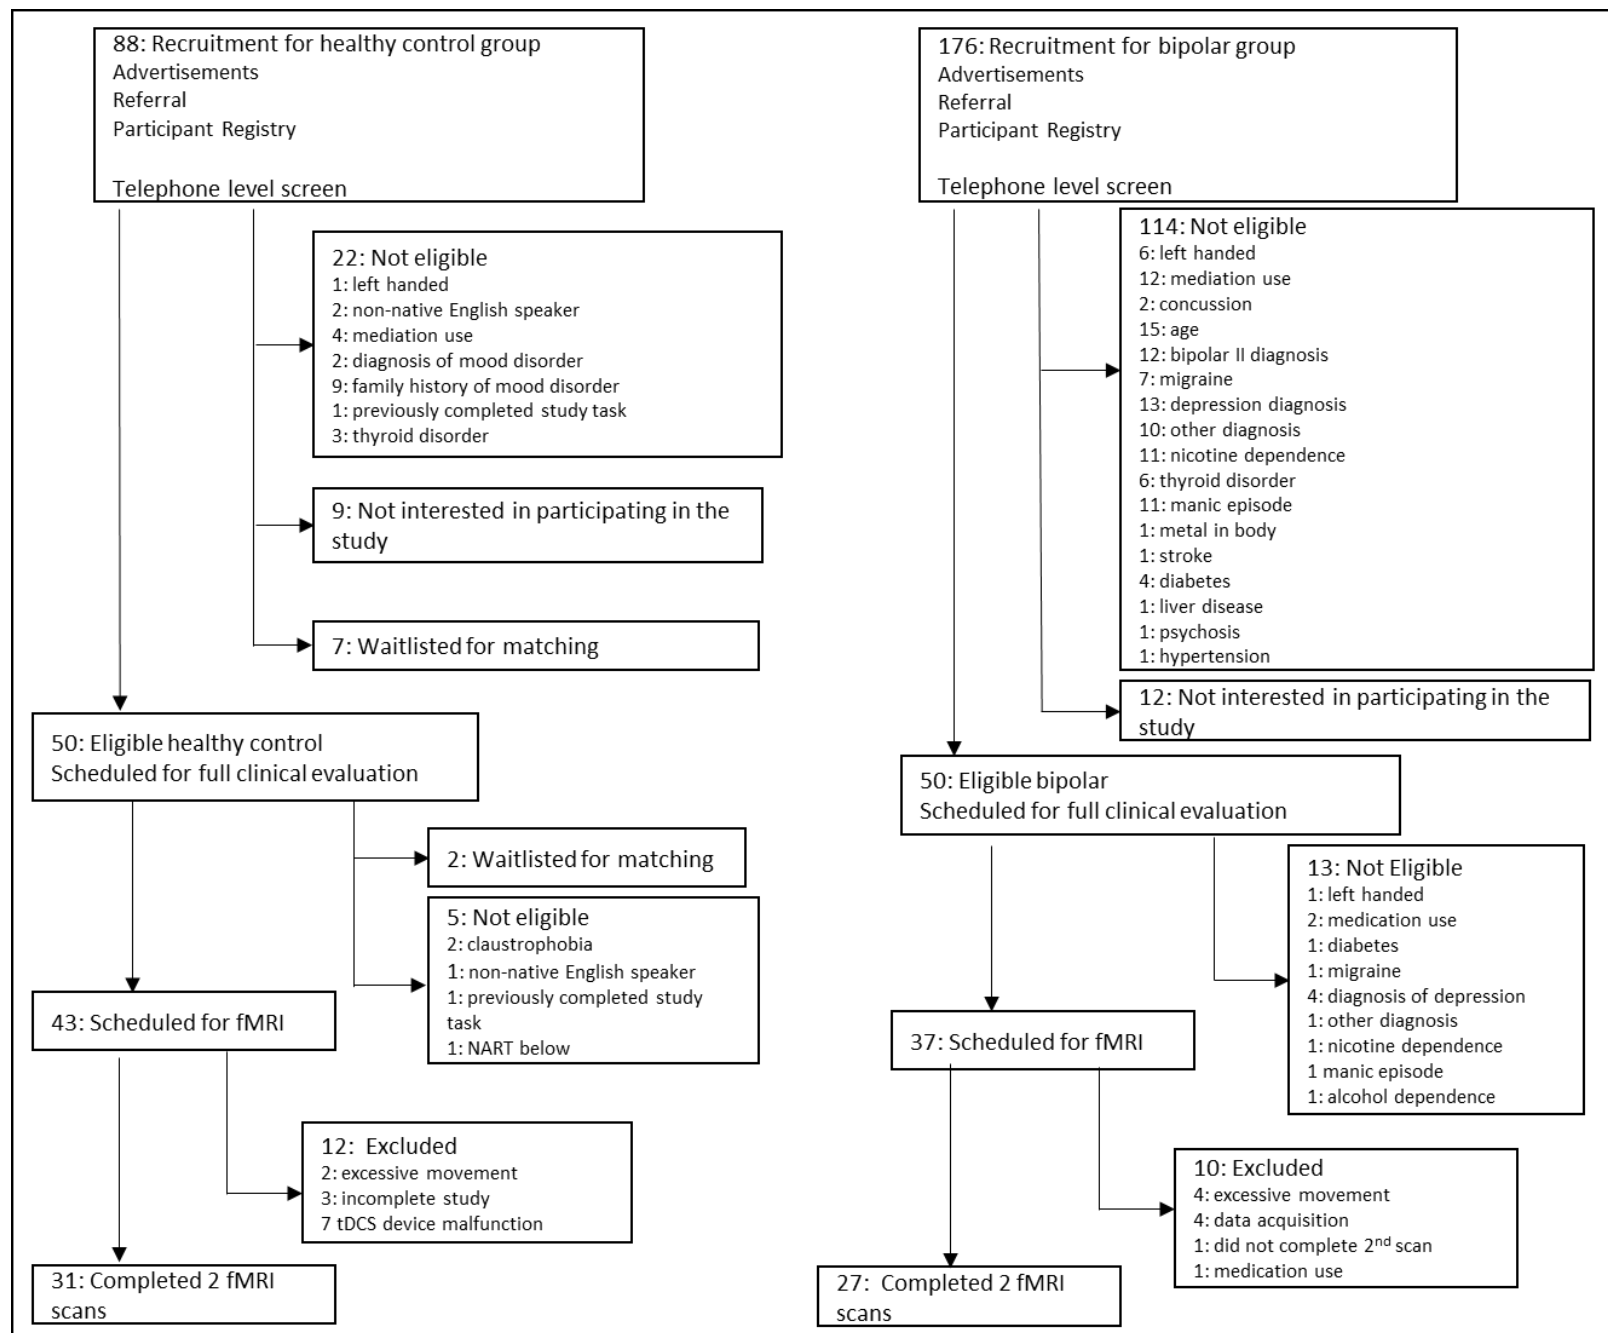

SI Figure 1. Recruitment strategy with eligibility requirements for Bipolar and Healthy participants.

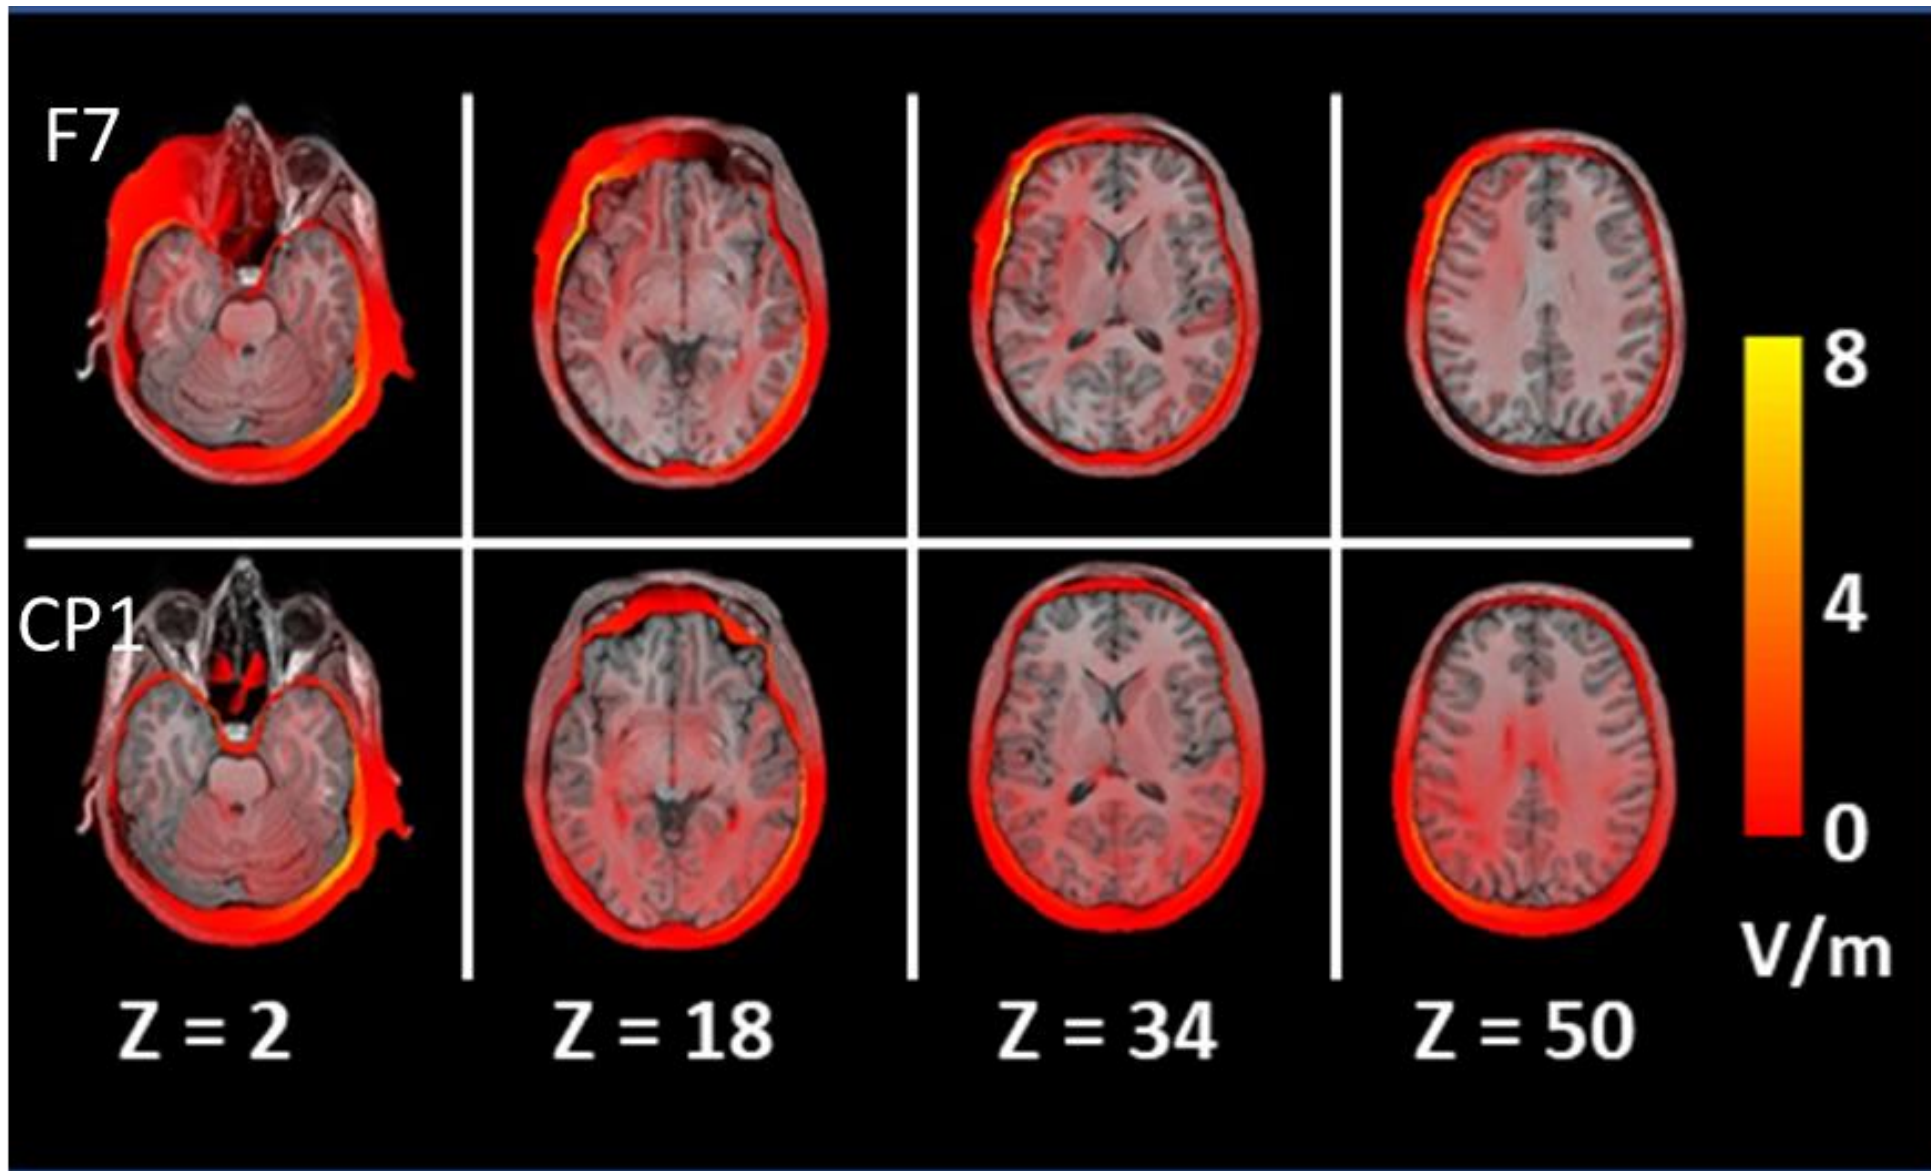

SI Figure 2. E-field model slices from the head of the representative Bipolar Disorder participant used in Figure 3 of the main paper

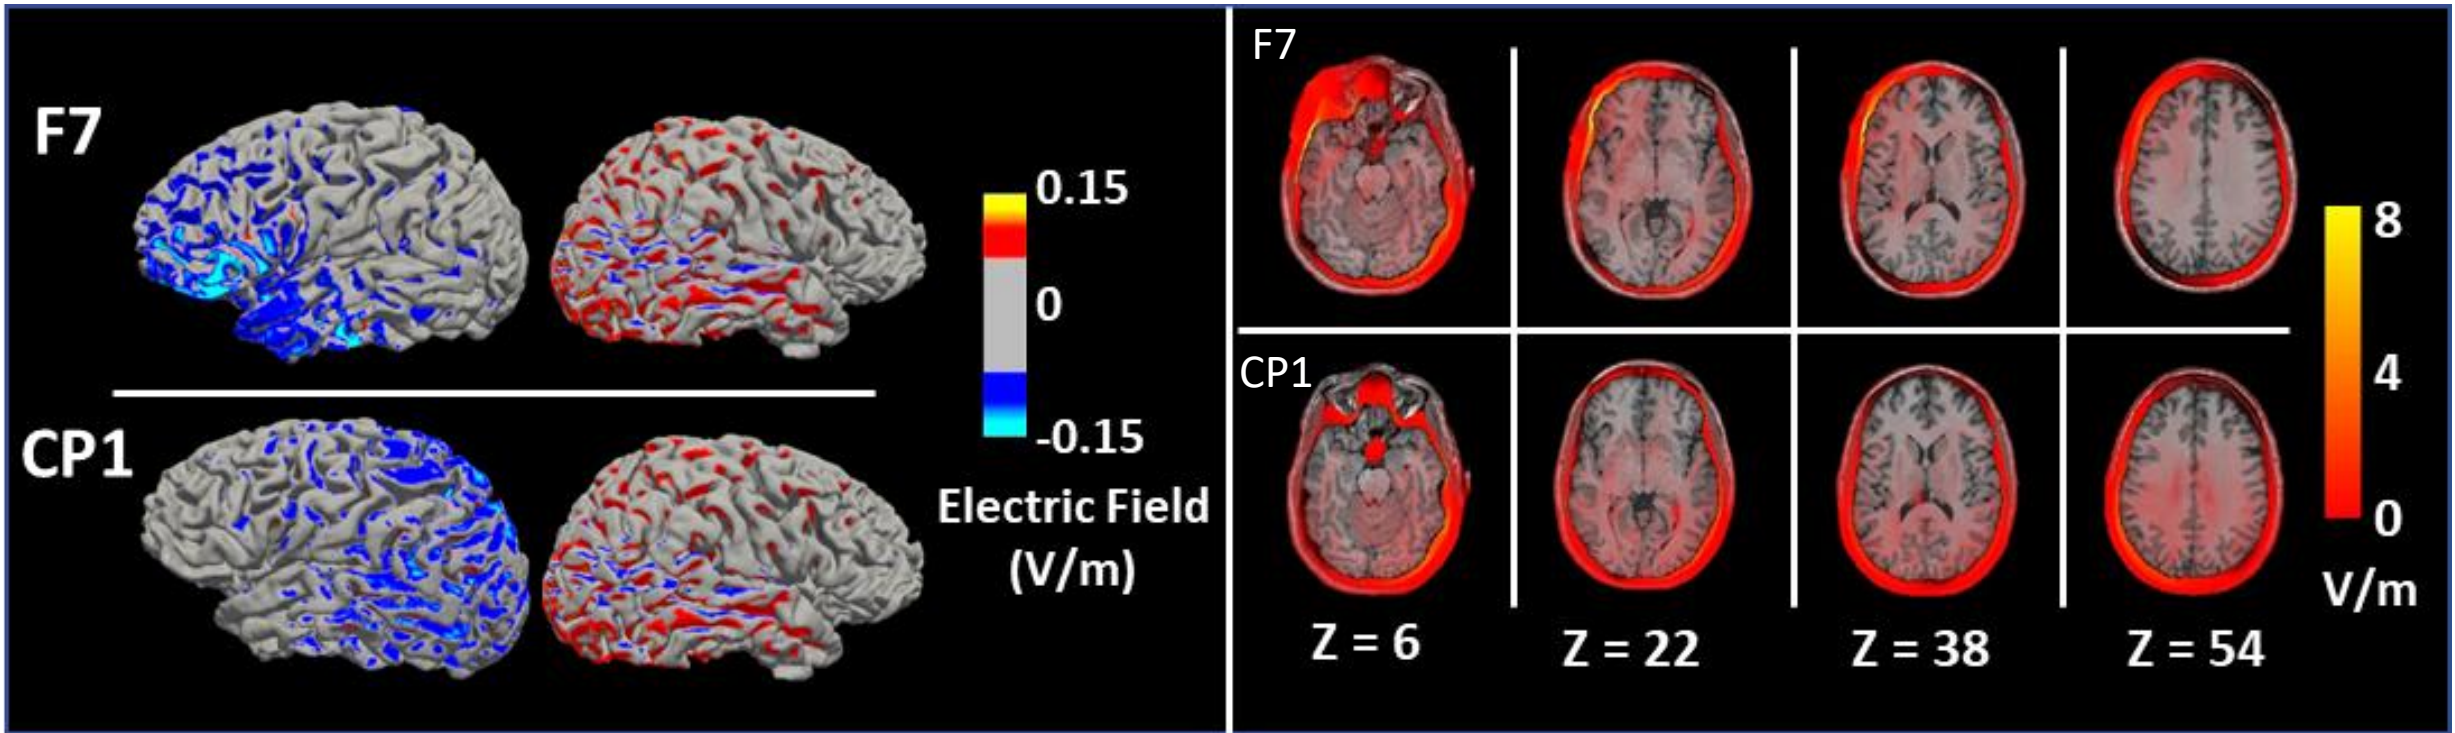

SI Figure 3. E-field model on the head of a representative Bipolar Disorder participant from the study

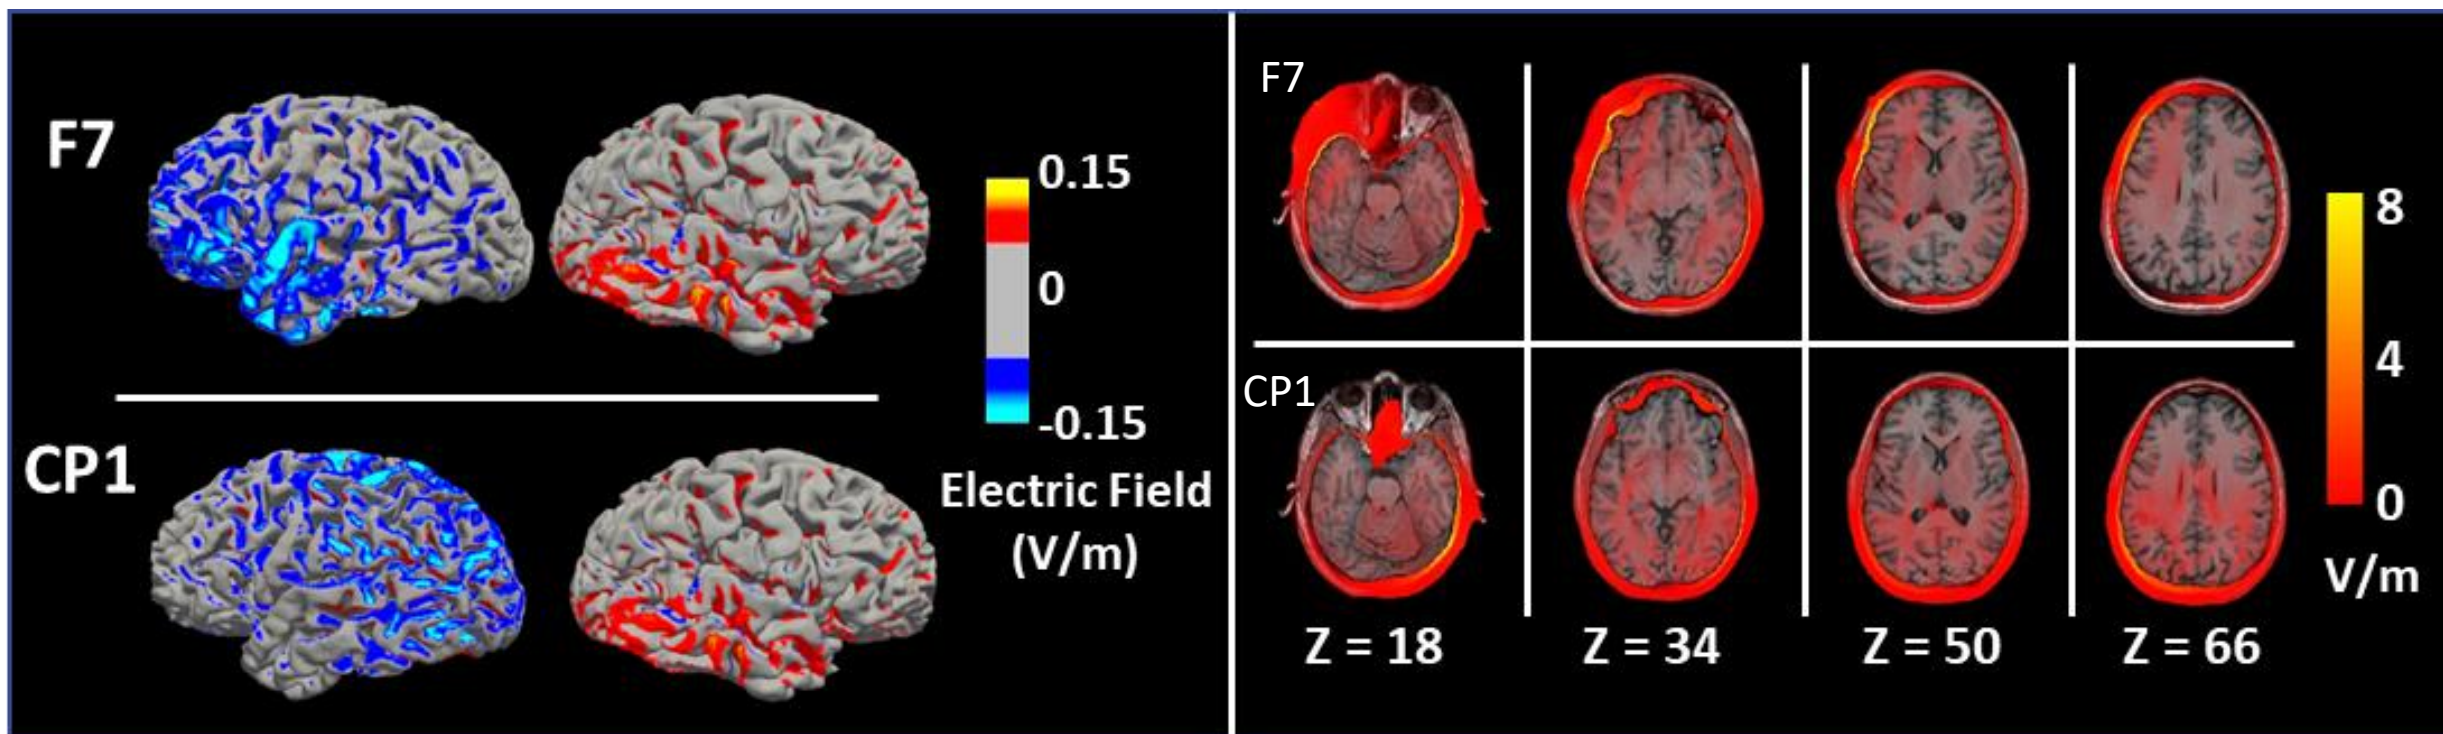

SI Figure 4. E-field model on the head of a representative healthy participant from the study

A) F7

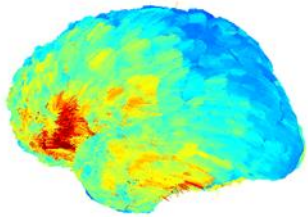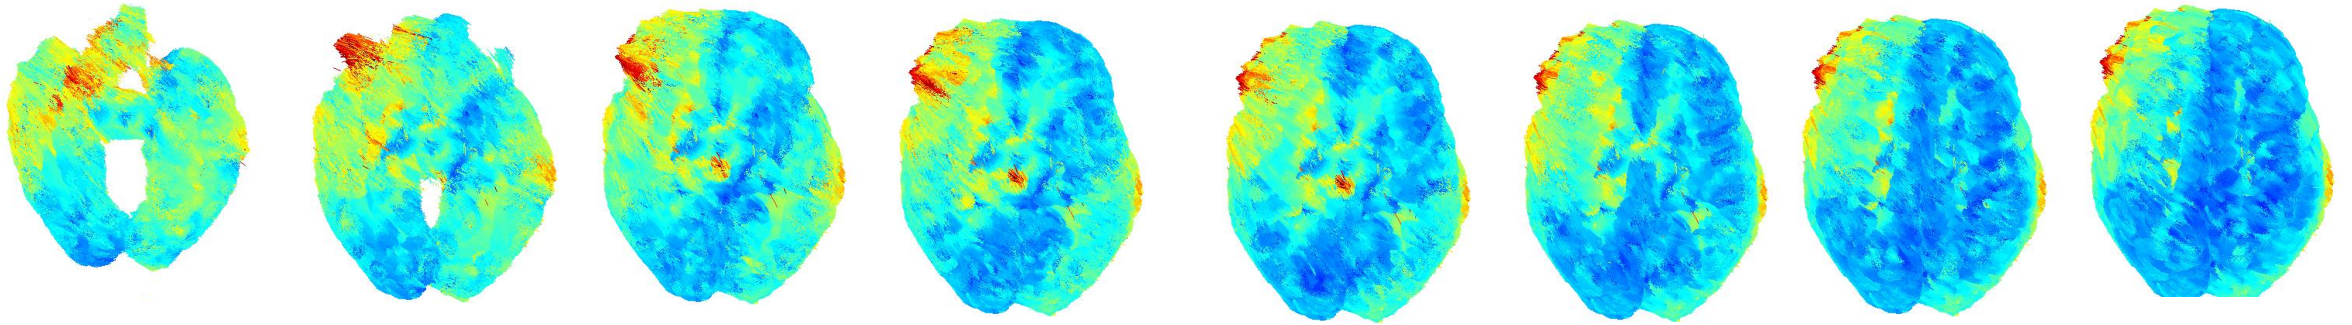

B) CP1

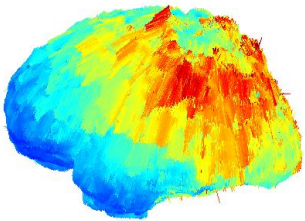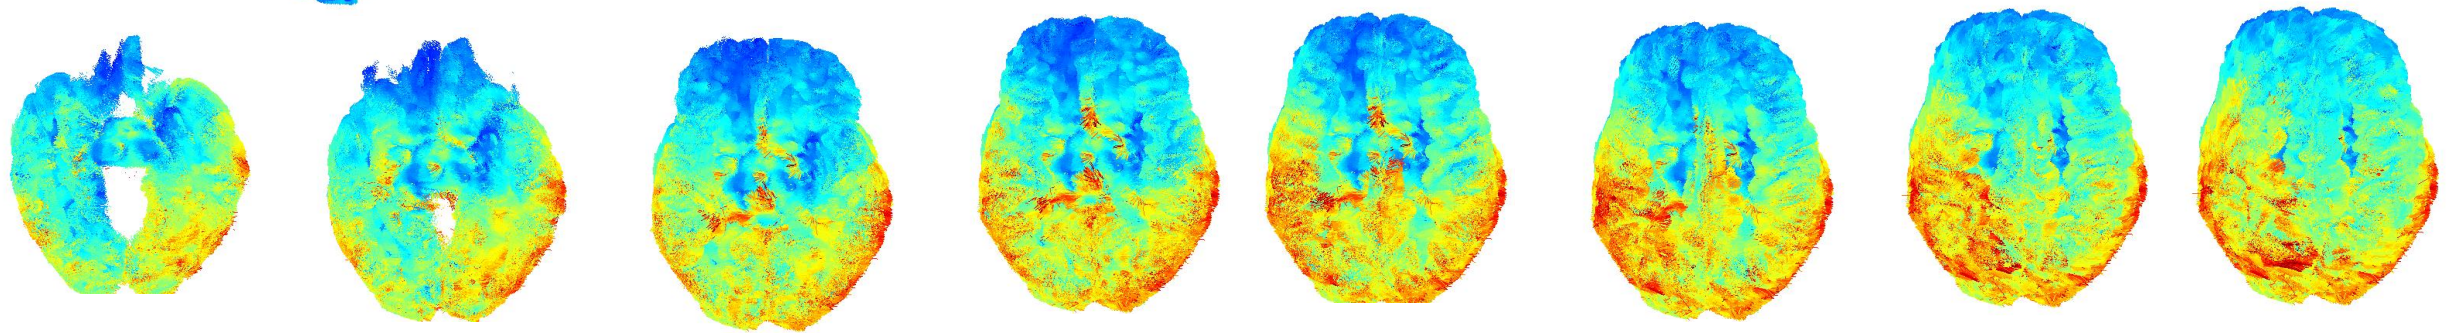

SI Figure 5. Stream lines show simulated directed current flow in the head of the Bipolar Disorder participant used in Figure 3 of the main paper and SI Figure 2. A) cathodal tDCS over F7. B) cathodal tDCS over CP1.

A) F7

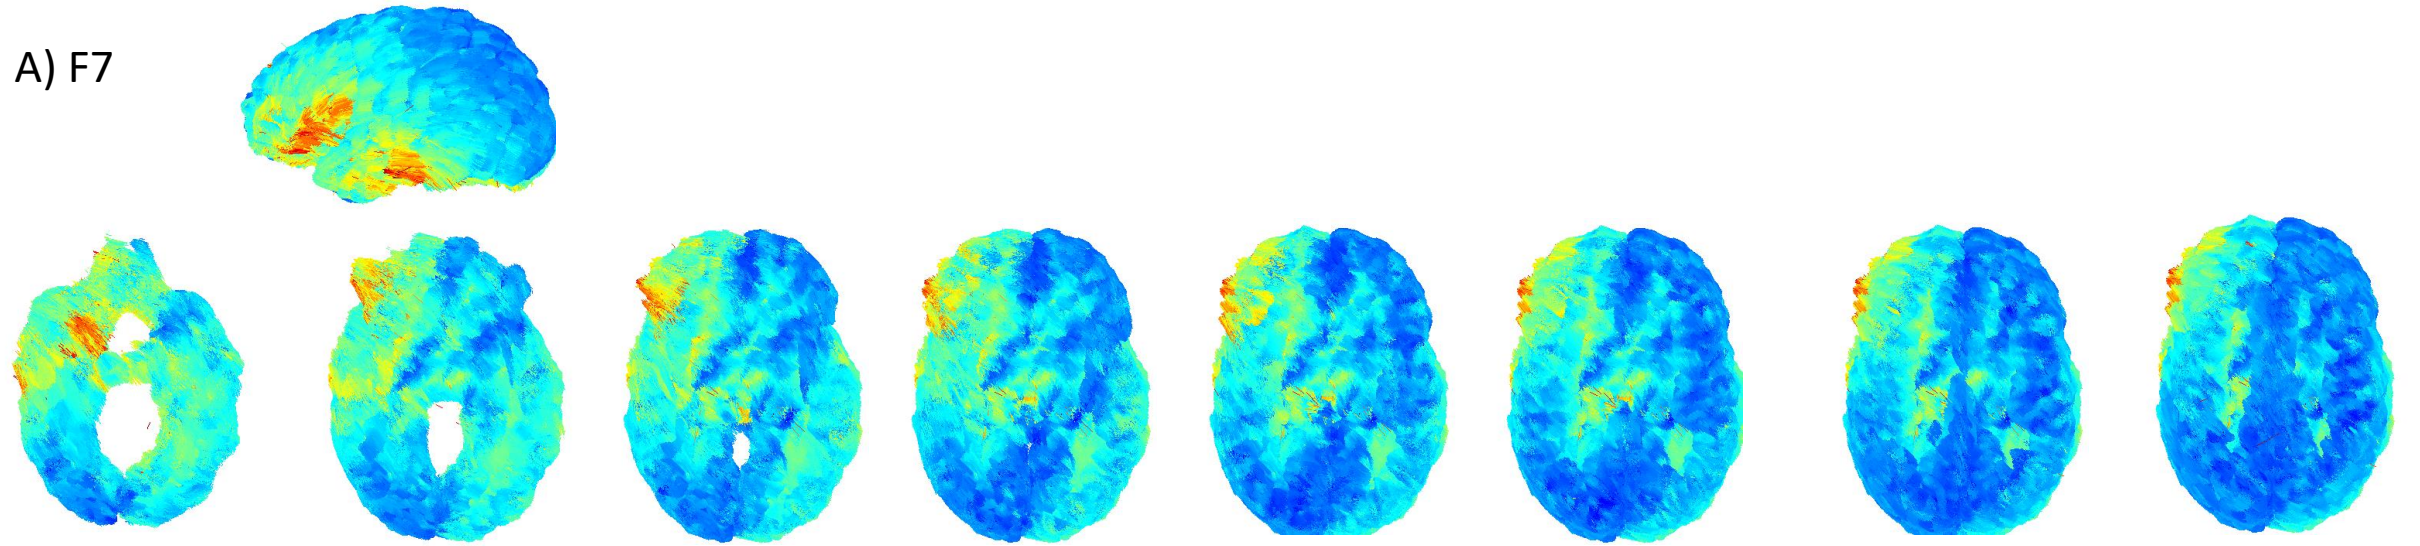

B) CP1

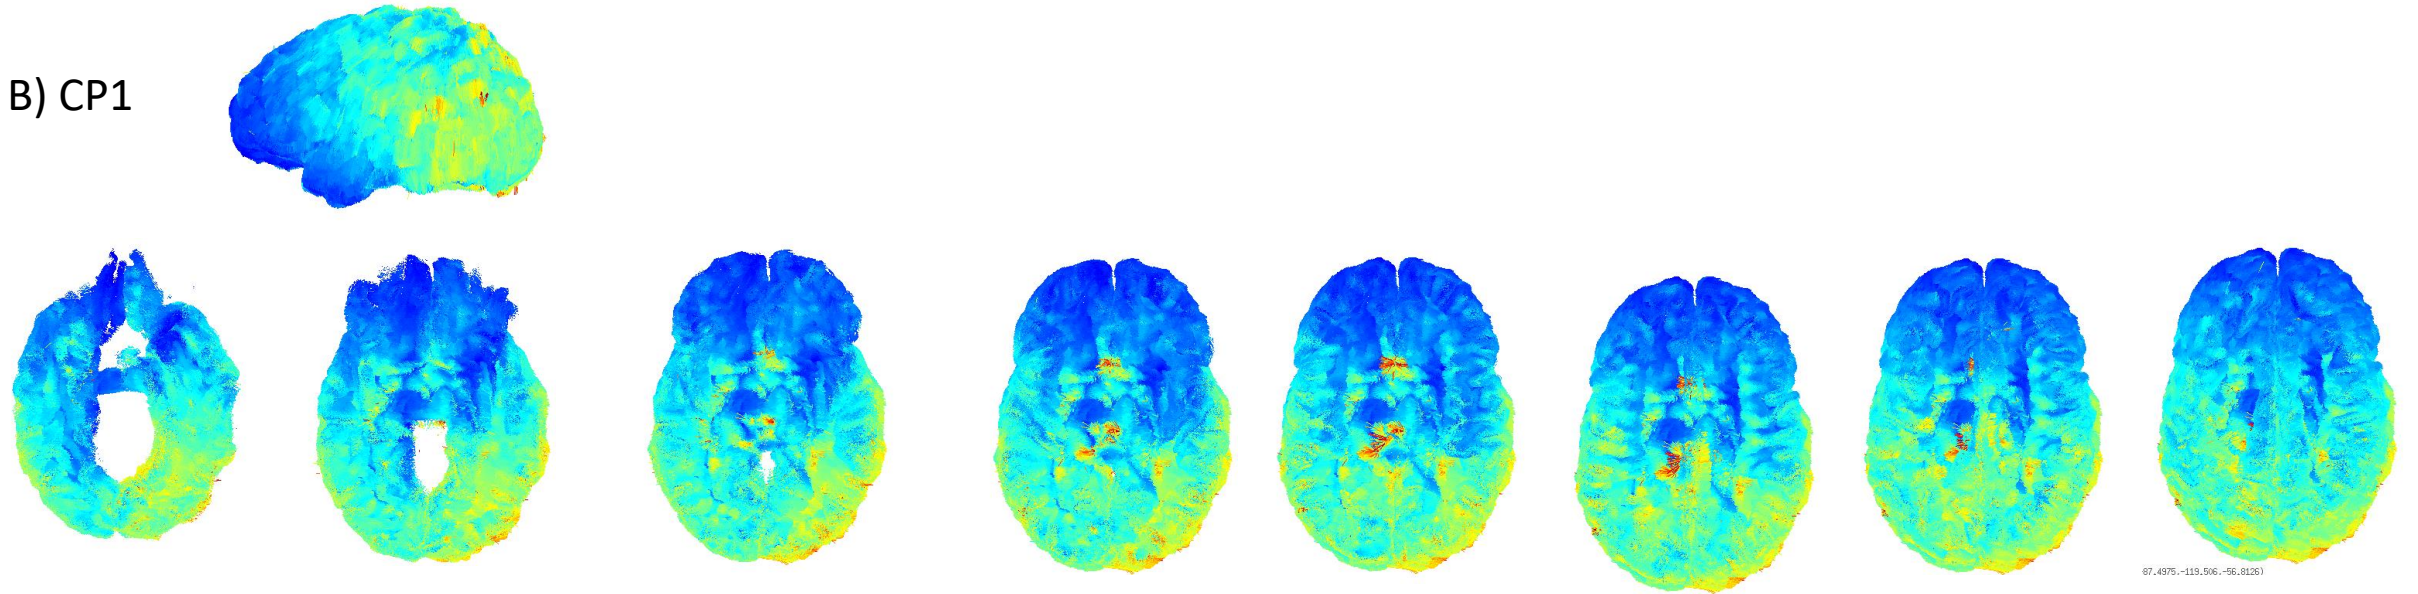

67,4975,-119,506,-56,8126)

SI Figure 6. Stream lines show simulated directed current flow in the head of a representative Bipolar Disorder participant from the study (same head as in SI Figure 3). A) cathodal tDCS over F7. B) cathodal tDCS over CP1.

A) F7

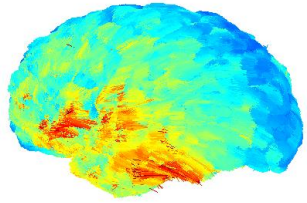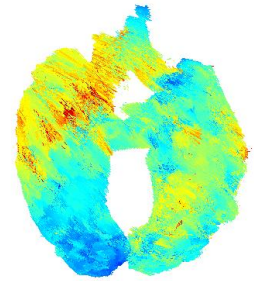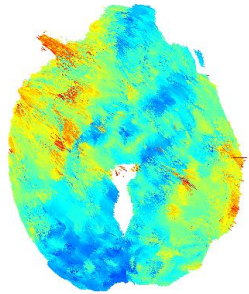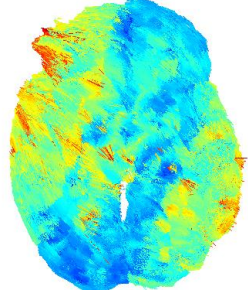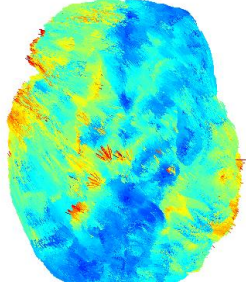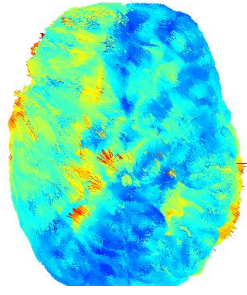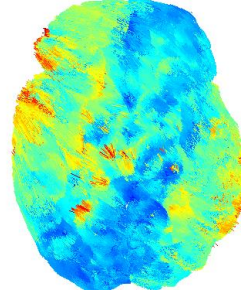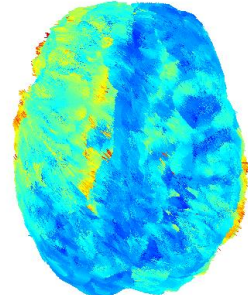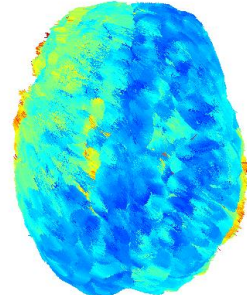

B) CP1

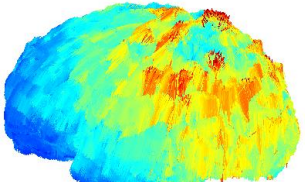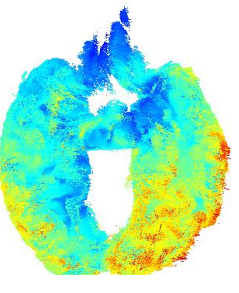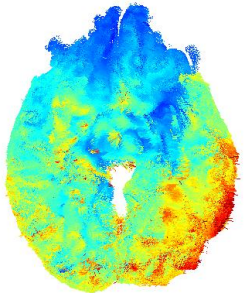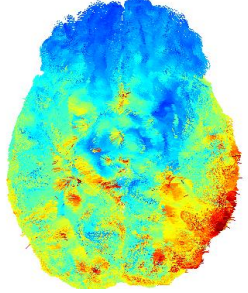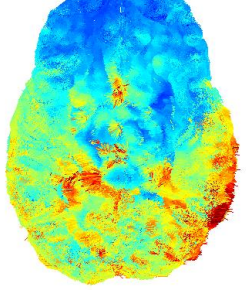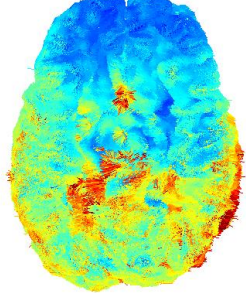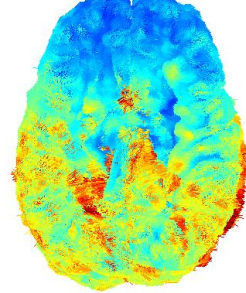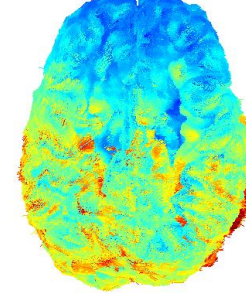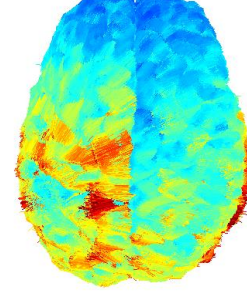

SI Figure 7. Stream lines show simulated current flow in a head of a representative healthy participant from the study (same head as in SI Figure 4). A) cathodal tDCS over F7. B) cathodal tDCS over CP1.

A)

316 269: 0.10

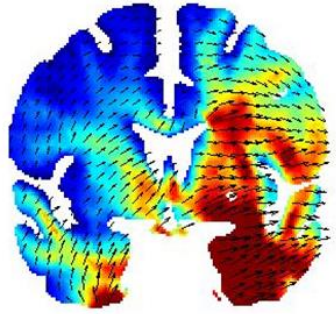

329 269: 0.10

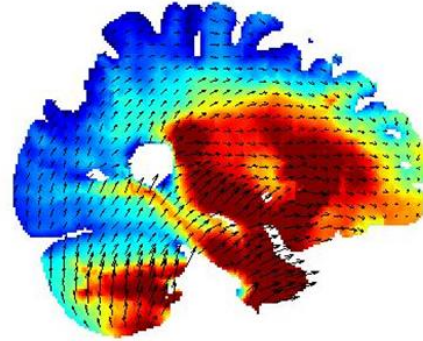

B)

313 301: 0.16

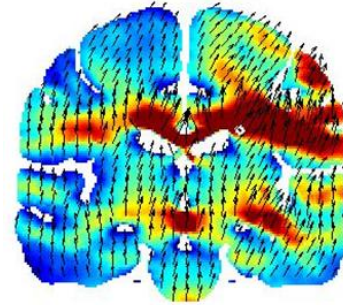

309 301: 0.16

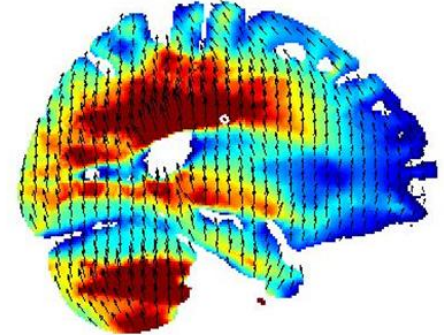

316 329: 0.10

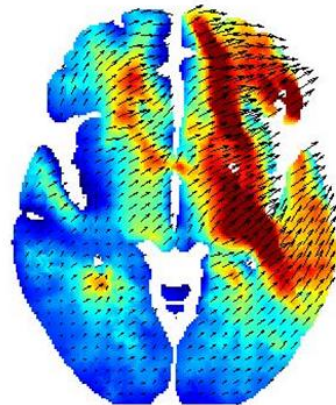

Electric field (V/m)

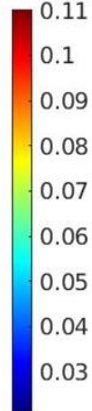

313 309: 0.16

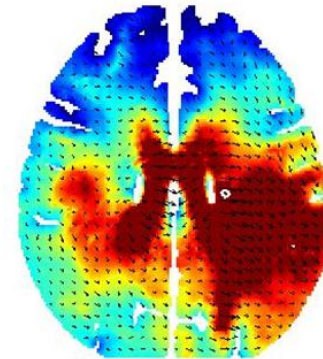

Electric field (V/m)

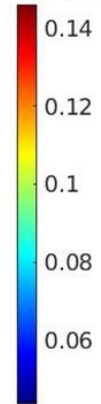

SI Figure 8. E-Field with current flow on the MNI Head. A) cathodal tDCS over F7. B) cathodal tDCS over CP1



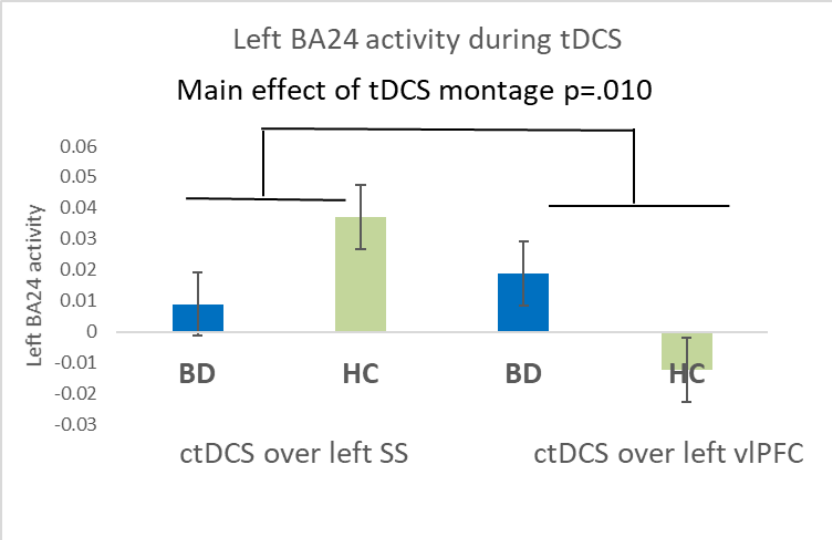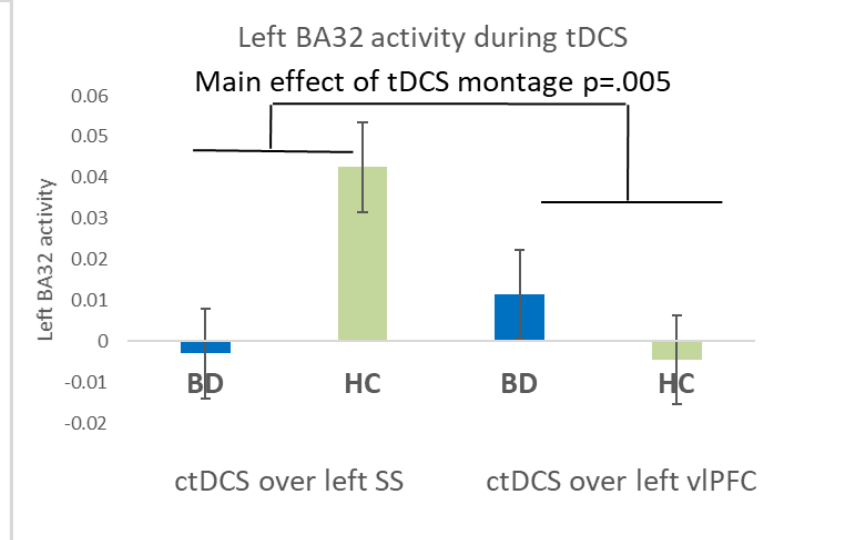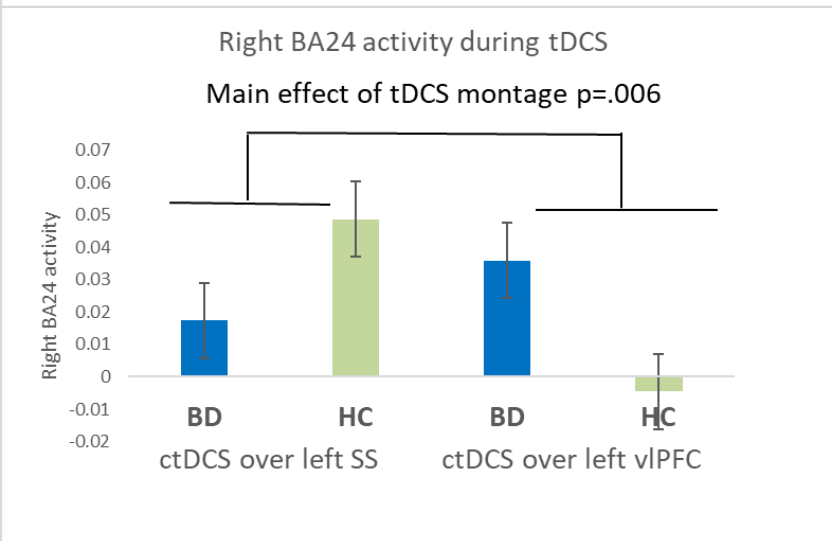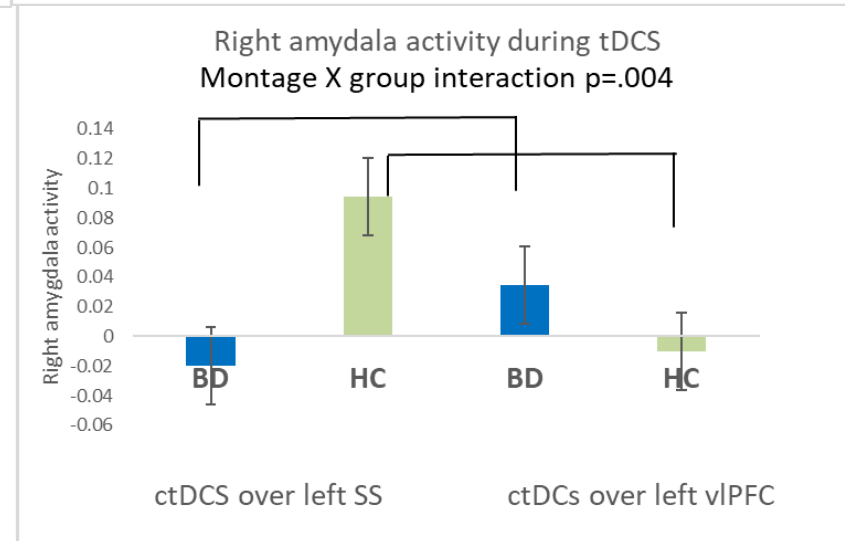

SI Figure 9. Bar graphs of parameters of right and left BA 24, left BA 32, and right amygdala activity to reward expectancy (RE) during cathodal tDCS over the left vIPFC versus cathodal tDCS over the left SS in BD and healthy participants. Abbreviations: ctDCS= cathodal transcranial direct current stimulation; vIPFC = ventrolateral prefrontal cortex; SS = somatosensory; BD= Bipolar Disorder; HC = healthy FDR corrected p-value = .01
